# Supplementary material for: Misalignment of a covered eye reveals frontoparallel smooth pursuit is driven by multiple signals
Source: Research Square preprint supplement (doi:10.21203/rs.3.rs-7403003/v1), 2025-09-12
Supplement: Supplementary file 1 [file df279c9c908332b5b21a1996.docx]

**Misalignment of a covered eye reveals frontoparallel smooth pursuit is driven by multiple signals**

*Stephen Heinen1, Devashish Singh1, Caroline Ulep1 & Scott Watamaniuk2

1The Smith-Kettlewell Eye Research Institute, San Francisco, CA; 2Wright State University, Dayton, Ohio

*Send correspondence to:

heinen@ski.org

415-345-2101

2318 Fillmore Street, San Francisco, CA, 94115

Keywords: phoria, fixation, strabismus, eye movements

**Supplemental Table 1.** Within subject one-sample t-test of all phoria values for a subject during fixation and pursuit with a null hypothesis that the mean overall phoria will be no different from zero. Significant results (p < 0.05) are highlighted and esophoric subjects are marked in blue.

|  | **fixation** | | | **pursuit** | | |
| --- | --- | --- | --- | --- | --- | --- |
| **subj #** | **p-value** | **t-statistic** | **df** | **p-value** | **t-statistic** | **df** |
| 1 | 0.000353 | -4.2196 | 22 | 6.03E-05 | -4.94443 | 22 |
| 2 | 5.08E-08 | -8.24309 | 21 | 2.03E-11 | -12.4249 | 22 |
| 3 | 6.64E-05 | -5.08067 | 19 | 0.023487 | -2.43442 | 22 |
| 4 | 2.91E-15 | -24.46 | 18 | 1.29E-12 | -14.2917 | 22 |
| **5** | **2.57E-09** | **9.589276** | **22** | **3.06E-08** | **8.319839** | **22** |
| 6 | 1.09E-06 | -6.65173 | 22 | 4.55E-07 | -7.04498 | 22 |
| 7 | 5.09E-16 | -23.4465 | 20 | 2.42E-19 | -34.6885 | 20 |
| **8** | **1.78E-05** | **-5.89148** | **17** | **0.002549** | **-3.40364** | **22** |
| 9 | 2.49E-19 | -29.9675 | 22 | 1.64E-24 | -51.9393 | 22 |
| 10 | 1.50E-16 | -28.9537 | 18 | 4.82E-20 | -32.3386 | 22 |
